CORRECTION

## Correction: Aggregating multiple test results to improve medical decision-making

Lucas Böttcher, Maria R. D'Orsogna, Tom Chou

There is an error in reference 75. The correct reference is: Böttcher L, Klingebiel R. Organizational selection of innovation. *Organization Science*. 2025;36,387–410.

### Reference

1. Böttcher L, D'Orsogna MR, Chou T. Aggregating multiple test results to improve medical decision-making. *PLoS Comput Biol*. 2025;21(1):e1012749. <https://doi.org/10.1371/journal.pcbi.1012749> PMID: [39775197](https://pubmed.ncbi.nlm.nih.gov/39775197/)

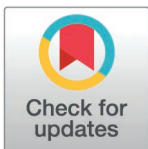

### OPEN ACCESS

**Citation:** Böttcher L, D'Orsogna MR, Chou T (2025) Correction: Aggregating multiple test results to improve medical decision-making. *PLoS Comput Biol* 21(8): e1013347. <https://doi.org/10.1371/journal.pcbi.1013347>

**Published:** August 4, 2025

**Copyright:** © 2025 Böttcher et al. This is an open access article distributed under the terms of the [Creative Commons Attribution License](https://creativecommons.org/licenses/by/4.0/), which permits unrestricted use, distribution, and reproduction in any medium, provided the original author and source are credited.
